# Supplementary material
Source: MDPI journal article supplement (https://www.mdpi.com/1424-2818/15/12/1172)
Supplement: s1 [file s1]

## Supplementary file3

Environmental variables used in Maxent to predict the habitat suitability distribution for the five target species. Variables with (–) sign were removed because of high cross-correlations.

| Variable                                        | <i>Chalicodoma<br/>flavipes</i> | <i>Chalicodoma sicula</i> | <i>Coelioxys coturnix</i> | <i>Megachile minutissima</i> | <i>Osmia submicans</i> |
|-------------------------------------------------|---------------------------------|---------------------------|---------------------------|------------------------------|------------------------|
| Annual mean temperature (Bio1)                  | ✓                               | ✓                         | ✓                         | –                            | –                      |
| Mean diurnal range (Bio2)                       | –                               | ✓                         | –                         | –                            | ✓                      |
| Isothermality (Bio3)                            | ✓                               | –                         | –                         | –                            | –                      |
| Temperature Seasonality (Bio4)                  | ✓                               | ✓                         | –                         | –                            | ✓                      |
| Maximum temperature of warmest month (Bio5)     | –                               | –                         | ✓                         | ✓                            | ✓                      |
| Minimum temperature of coldest month (Bio6)     | –                               | –                         | ✓                         | –                            | –                      |
| Temperature annual range (Bio7)                 | –                               | ✓                         | –                         | –                            | ✓                      |
| Mean temperature of the warmest quarter (Bio10) | –                               | –                         | ✓                         | ✓                            | –                      |
| Mean temperature of the coldest quarter (Bio11) | –                               | –                         | ✓                         | –                            | –                      |
| Annual precipitation (Bio12)                    | –                               | –                         | –                         | ✓                            | –                      |
| Precipitation of the wettest month (Bio13)      | –                               | –                         | –                         | ✓                            | –                      |
| Precipitation of the driest month (Bio14)       | –                               | ✓                         | –                         | –                            | –                      |
| Precipitation seasonality (Bio15)               | –                               | –                         | ✓                         | –                            | ✓                      |
| Precipitation of the wettest quarter (Bio16)    | –                               | –                         | –                         | ✓                            | ✓                      |
| Precipitation of driest quarter (Bio17)         | ✓                               | –                         | –                         | ✓                            | ✓                      |
