# Supplementary material
Source: MDPI journal article supplement (https://www.mdpi.com/1424-2818/15/12/1172)

## Supplementary file8

(a) and (b) Two old mud walls of houses surrounded by new houses and would be exchanged with new houses; (c) and (d) Habitat of two cavity nesting bees of *C. nigripes* and *C. sicula*; (e) and (f) Two species of cleptoparasitic bees *Coelioxys decipiens* and *Radoszkowskiana rufiventris* (Spinola, 1838).

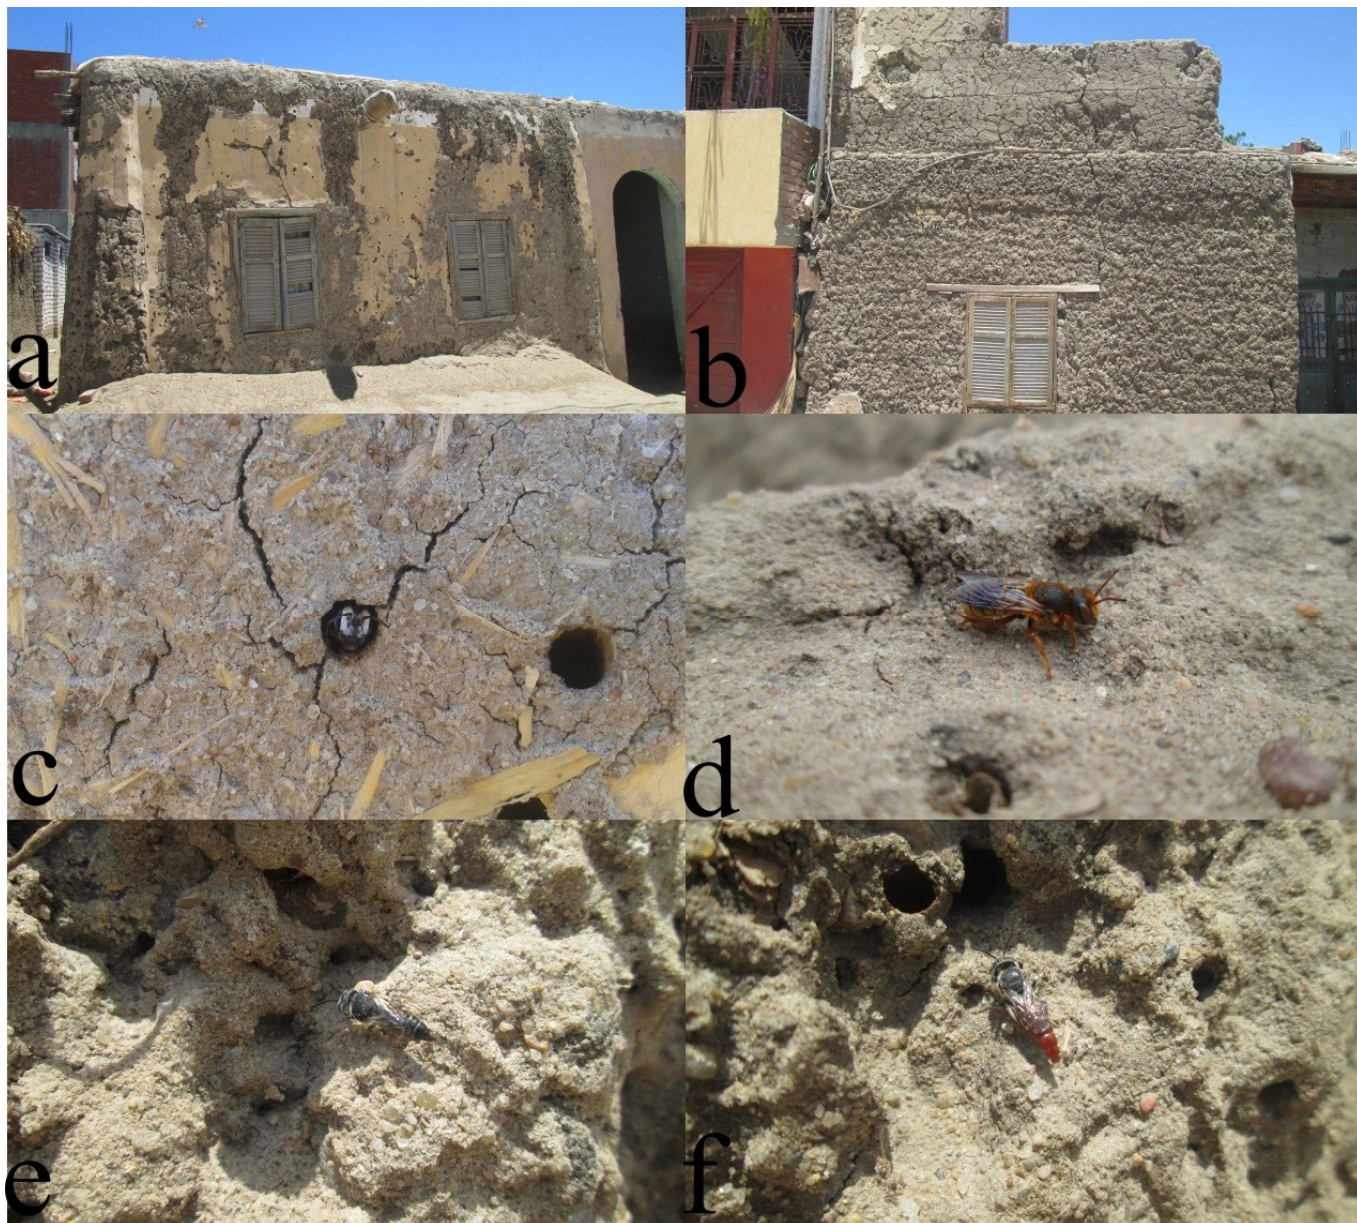

Supplement: s1 [file s1]
