# Supplementary material
Source: MDPI journal article supplement (https://www.mdpi.com/1424-2818/15/12/1172)

## Supplementary file5

Jackknife for each species show the most effective environmental variables and their contribution on produced models.

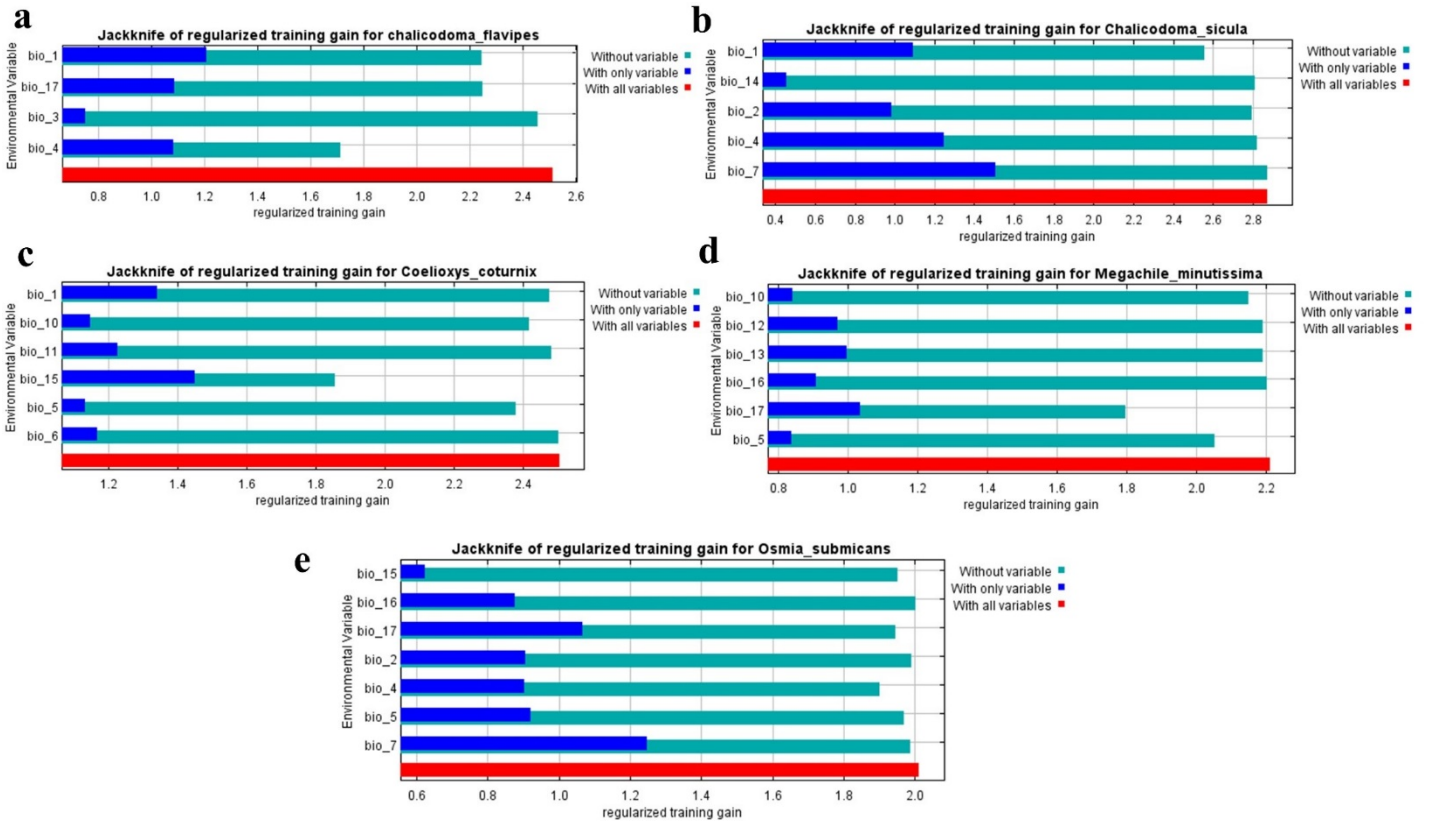

Supplement: s1 [file s1]
