# Supplementary material
Source: MDPI journal article supplement (https://www.mdpi.com/1424-2818/15/12/1172)

## Supplementary file6

Response curves showing the relationships between the probability of presence of each species and one top bioclimatic predictor: values shown are average over ten replicate runs.

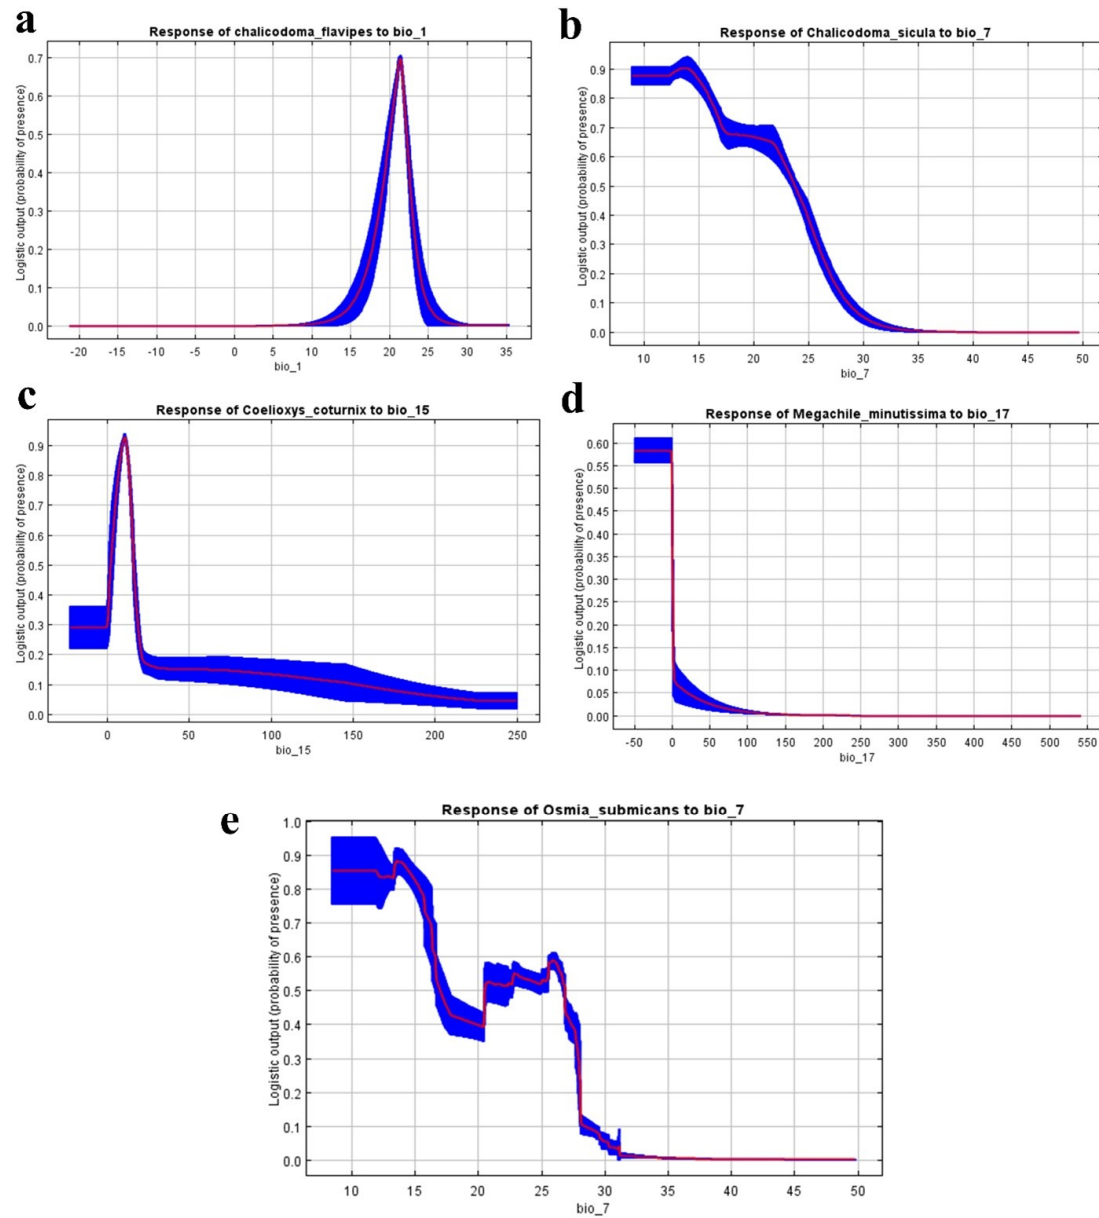

Supplement: s1 [file s1]
